# Supplementary material for: Synthesis, X-ray, Hirshfeld, and AIM Studies on Zn(II) and Cd(II) Complexes with Pyridine Ligands
Source: MDPI journal article supplement (doi:10.3390/cryst12050590), 2022-04-22
Supplement: s1 [file s1]

# Synthesis, X-ray, Hirshfeld, and AIM studies on Zn(II) and Cd(II) complexes with pyridine ligands

Mezna Saleh Altowyan<sup>1</sup>, Eman M. Fathalla<sup>2</sup>, Dalia Hawas<sup>2</sup>, Jörg H. Albering<sup>3</sup>, Assem Barakat<sup>4</sup>, Morsy A. M. Abu-Youssef<sup>2\*</sup>, Saied M. Soliman<sup>2\*</sup>, Taher S. Kassem<sup>2</sup>, Ahmed M. A. Badr<sup>2</sup>

<sup>1</sup> Department of Chemistry, College of Science, Princess Nourah bint Abdulrahman University, P.O. Box 84428, Riyadh 11671, Saudi Arabia. msaltowyan@pnu.edu.sa (M.S.A.).

<sup>2</sup> Department of Chemistry, Faculty of Science, Alexandria University, P.O. Box 426, Ibrahimia, Alexandria 21321, Egypt. Emails: Eman.nameir@alexu.edu.eg (E.M.F.), Morsy5@AlexU.edu.eg (MAMA), taher.kassem.2011@gmail.com (T. S. K) and ahmed\_badr@alexu.edu.eg (AMAB).

<sup>3</sup> Graz University of Technology, Mandellstr. 11/III, A-8010 Graz, Austria. Email: joerg.albering@tugraz.at (JHA).

Department of Chemistry, College of Science, King Saud University, P. O. Box 2455, Riyadh 11451, Saudi Arabia. ambarakat@ksu.edu.sa (A.B.)

\*Correspondence: Morsy5@AlexU.edu.eg (MAMA); and saied1soliman@yahoo.com or saeed.soliman@alexu.edu.eg (SMS)

**Method S1 Crystal structure determination**

The crystal structures of the studied complexes were determined using a Bruker APEX II diffractometer using graphite monochromated MoK $\alpha$  radiation. SADABS was used for absorption corrections [74], and all calculations were performed using the SHELXTL program package [75]. The positions of the heavy atoms were detected by the direct methods of SHELXS. The hydrogen atoms bonded to carbon atoms were refined according to the riding model implemented in SHELX. The hydrogen atoms in the crystal structure bonded to oxygen were refined with DFIX restraints and with a fixed thermal parameter at a value of 1.5 times the displacement parameters of the respective oxygen atoms. Details regarding the crystallographic measurements are included in **Table S1**.

**Table S1** Crystallographic details of complexes **1–3**.

|                                                     |                                                                                                                                |                                                                     |                                                                     |
|-----------------------------------------------------|--------------------------------------------------------------------------------------------------------------------------------|---------------------------------------------------------------------|---------------------------------------------------------------------|
| CCDC                                                | 2162606                                                                                                                        | 21626067                                                            | 2162608                                                             |
| Empirical formula                                   | C <sub>16</sub> H <sub>18</sub> Cl <sub>2</sub> N <sub>2</sub> O <sub>4</sub> Zn                                               | C <sub>10</sub> H <sub>24</sub> N <sub>2</sub> O <sub>10</sub> SZn  | C <sub>16</sub> H <sub>22</sub> CdN <sub>4</sub> O <sub>4</sub>     |
| Formula weight                                      | 438.59 g/mol                                                                                                                   | 429.74 g/mol                                                        | 446.77 g/mol                                                        |
| Temperature/K                                       | 100(2) K                                                                                                                       | 100(2) K                                                            | 100(2) K                                                            |
| Wavelength                                          | 0.71073 Å                                                                                                                      | 0.71073 Å                                                           | 0.71073 Å                                                           |
| Crystal system                                      | Monoclinic                                                                                                                     | Orthorhombic                                                        | Monoclinic                                                          |
| Space group                                         | <i>P</i> 2 <sub>1</sub> / <i>c</i>                                                                                             | <i>P</i> 2 <sub>1</sub> 2 <sub>1</sub> 2 <sub>1</sub>               | <i>P</i> 2 <sub>1</sub> / <i>n</i>                                  |
| <i>a</i> /Å                                         | 14.1940(9)                                                                                                                     | 7.6541(3)                                                           | 8.4025(4)                                                           |
| <i>b</i> /Å                                         | 19.8380(11)                                                                                                                    | 9.9244(4)                                                           | 17.1565(15)                                                         |
| <i>c</i> /Å                                         | 14.3957(9)                                                                                                                     | 23.1526(10)                                                         | 12.9867(9)                                                          |
| $\alpha$ /°                                         | 90                                                                                                                             | 90°                                                                 | 90                                                                  |
| $\beta$ /°                                          | 111.432(3)                                                                                                                     | 90°                                                                 | 94.661(3)                                                           |
| $\gamma$ /°                                         | 90                                                                                                                             | 90°                                                                 | 90                                                                  |
| Volume                                              | 3773.3(4) Å <sup>3</sup>                                                                                                       | 1758.73(12) Å <sup>3</sup>                                          | 1865.9(2) Å <sup>3</sup>                                            |
| <i>Z</i>                                            | 8                                                                                                                              | 4                                                                   | 4                                                                   |
| Density (calculated)                                | 1.544 g/cm <sup>3</sup>                                                                                                        | 1.623 g/cm <sup>3</sup>                                             | 1.590 g/cm <sup>3</sup>                                             |
| Absorption coefficient                              | 1.607 mm <sup>-1</sup>                                                                                                         | 1.566 mm <sup>-1</sup>                                              | 1.197 mm <sup>-1</sup>                                              |
| <i>F</i> (000)                                      | 1792                                                                                                                           | 896                                                                 | 904                                                                 |
| Crystal size                                        | 0.07 x 0.11 x 0.17 mm <sup>3</sup>                                                                                             | 0.26 x 0.29 x 0.31 mm <sup>3</sup>                                  | 0.10 x 0.20 x 0.27 mm <sup>3</sup>                                  |
| Theta range for data collection                     | 1.83 to 27.50°                                                                                                                 | 2.23 to 33.20°                                                      | 2.71 to 33.21°                                                      |
| Index ranges                                        | -18 ≤ <i>h</i> ≤ 18,<br>-23 ≤ <i>k</i> ≤ 25,<br>-18 ≤ <i>l</i> ≤ 18                                                            | -11 ≤ <i>h</i> ≤ 11,<br>-15 ≤ <i>k</i> ≤ 15,<br>-24 ≤ <i>l</i> ≤ 35 | -12 ≤ <i>h</i> ≤ 12,<br>-26 ≤ <i>k</i> ≤ 26,<br>-19 ≤ <i>l</i> ≤ 20 |
| Reflections collected                               | 63161                                                                                                                          | 42805                                                               | 48272                                                               |
| Independent reflections                             | 8539 ( <i>R</i> (int) = 0.0625)                                                                                                | 6683 ( <i>R</i> (int) = 0.0339)                                     | 7115 ( <i>R</i> (int) = 0.0366)                                     |
| Completeness to $\theta = 66.67^\circ$              | 98.50%                                                                                                                         | 99.90%                                                              | 99.70%                                                              |
| Absorption correction                               | Multiscan                                                                                                                      | Multiscan                                                           | Multiscan                                                           |
| Max. and min. transmission                          | 0.8960 and 0.7720                                                                                                              | 0.6860 and 0.6420                                                   | 1.000 and 0.9216                                                    |
| Refinement method                                   | Full-matrix least-squares on <i>F</i> <sup>2</sup> Full-matrix least-squares on <i>F</i> <sup>2</sup> on <i>F</i> <sup>2</sup> |                                                                     |                                                                     |
| Data / restraints / parameters                      | 8539 / 0 / 455                                                                                                                 | 6683 / 9 / 281                                                      | 7115 / 0 / 246                                                      |
| Goodness of fit on <i>F</i> <sup>2</sup>            | 1.08                                                                                                                           | 1.068                                                               | 1.025                                                               |
| Final <i>R</i> indices ( <i>I</i> > 2σ( <i>I</i> )) | <i>R</i> 1 = 0.0362, <i>wR</i> 2 = 0.0810                                                                                      | <i>R</i> 1 = 0.0178, <i>wR</i> 2 = 0.0458                           | <i>R</i> 1 = 0.0162, <i>wR</i> 2 = 0.0421                           |
| <i>R</i> indices (all data)                         | <i>R</i> 1 = 0.0852, <i>wR</i> 2 = 0.1112                                                                                      | <i>R</i> 1 = 0.0183, <i>wR</i> 2 = 0.0459                           | <i>R</i> 1 = 0.0179, <i>wR</i> 2 = 0.0431                           |
| Largest diff. peak and hole                         | 0.873 and -0.881                                                                                                               | 0.626 and -0.591                                                    | 0.554 and -0.345                                                    |

**Table S2** Hydrogen bond parameters (Å, °) in **1**.

| D-H...A       | d(D-H) | d(H...A) | d(D...A) | <(DHA) | Symm. Code      |
|---------------|--------|----------|----------|--------|-----------------|
| C7-H7A...O5   | 0.99   | 2.58     | 3.076(5) | 111    | 1+x,1/2-y,1/2+z |
| C31-H31B...O4 | 0.99   | 2.55     | 3.055(6) | 111    | 1+x,1/2-y,1/2+z |

**Table S3** AIM topology parameters (a.u.) at bond critical points (BCPs) as well as the bond distances of the coordinated bonds in complexes **1**, **2**, and **3**.

| Atoms                   | BD     | q      | G(r) <sup>a</sup> | V(r) <sup>b</sup> | H(r)    | ∇ <sup>2</sup> q |
|-------------------------|--------|--------|-------------------|-------------------|---------|------------------|
| Complex 1<br>(Zn1 unit) |        |        |                   |                   |         |                  |
| Zn1-Cl2                 | 2.2225 | 0.0506 | 0.0995            | -0.1062           | -0.0067 | 0.3715           |
| Zn1-Cl1                 | 2.2243 | 0.0503 | 0.0989            | -0.1056           | -0.0066 | 0.3692           |
| Zn1-N3                  | 2.0580 | 0.0636 | 0.1195            | -0.1322           | -0.0127 | 0.4274           |
| Zn1-N4                  | 2.0566 | 0.0639 | 0.1203            | -0.1331           | -0.0128 | 0.4302           |
| (Zn2 unit)              |        |        |                   |                   |         |                  |
| Zn2-Cl3                 | 2.2224 | 0.0506 | 0.0997            | -0.1064           | -0.0067 | 0.3718           |
| Zn2-Cl4                 | 2.2256 | 0.0502 | 0.0985            | -0.1051           | -0.0066 | 0.3674           |
| Zn2-N1                  | 2.0607 | 0.0633 | 0.1187            | -0.1313           | -0.0126 | 0.4246           |
| Zn2-N2                  | 2.0590 | 0.0636 | 0.1194            | -0.1320           | -0.0127 | 0.4267           |
| Complex 2<br>(Part A)   |        |        |                   |                   |         |                  |
| Zn1-O9                  | 2.1283 | 0.0473 | 0.0838            | -0.0911           | -0.0073 | 0.3060           |
| Zn1-O2                  | 2.1145 | 0.0476 | 0.0853            | -0.0925           | -0.0072 | 0.3127           |
| Zn1-O4                  | 2.0657 | 0.0529 | 0.1009            | -0.1082           | -0.0073 | 0.3744           |
| Zn1-O3                  | 2.0797 | 0.0508 | 0.0948            | -0.1015           | -0.0067 | 0.3525           |
| Zn1-O5                  | 2.1011 | 0.0472 | 0.0872            | -0.0931           | -0.0059 | 0.3252           |
| Zn1-N1                  | 2.1388 | 0.0568 | 0.0937            | -0.1072           | -0.0135 | 0.3207           |
| (Part B)                |        |        |                   |                   |         |                  |
| Zn1-O9                  | 2.1283 | 0.0473 | 0.0837            | -0.0910           | -0.0073 | 0.3058           |
| Zn1-O2                  | 2.1145 | 0.0476 | 0.0853            | -0.0924           | -0.0072 | 0.3125           |
| Zn1-O4                  | 2.0657 | 0.0529 | 0.1008            | -0.1080           | -0.0073 | 0.3741           |
| Zn1-O3                  | 2.0797 | 0.0508 | 0.0947            | -0.1014           | -0.0067 | 0.3522           |
| Zn1-O5                  | 2.1011 | 0.0474 | 0.0878            | -0.0939           | -0.0061 | 0.3266           |
| Zn1-N1                  | 2.1388 | 0.0567 | 0.0936            | -0.1070           | -0.0133 | 0.3212           |
| Complex 3               |        |        |                   |                   |         |                  |
| Cd1-O1                  | 2.2993 | 0.0454 | 0.0768            | -0.0799           | -0.0032 | 0.2946           |
| Cd1-O2                  | 2.4483 | 0.0308 | 0.0485            | -0.0481           | 0.0005  | 0.1960           |
| Cd1-O3                  | 2.3813 | 0.0363 | 0.0594            | -0.0599           | -0.0005 | 0.2356           |
| Cd1-O4                  | 2.3355 | 0.0423 | 0.0692            | -0.0719           | -0.0027 | 0.2660           |
| Cd1-N1                  | 2.3210 | 0.0512 | 0.0782            | -0.0845           | -0.0063 | 0.2877           |
| Cd1-N2                  | 2.2723 | 0.0578 | 0.0905            | -0.0998           | -0.0093 | 0.3248           |

<sup>a</sup> V(r) is the potential energy density and <sup>b</sup> G(r) is the kinetic energy density.

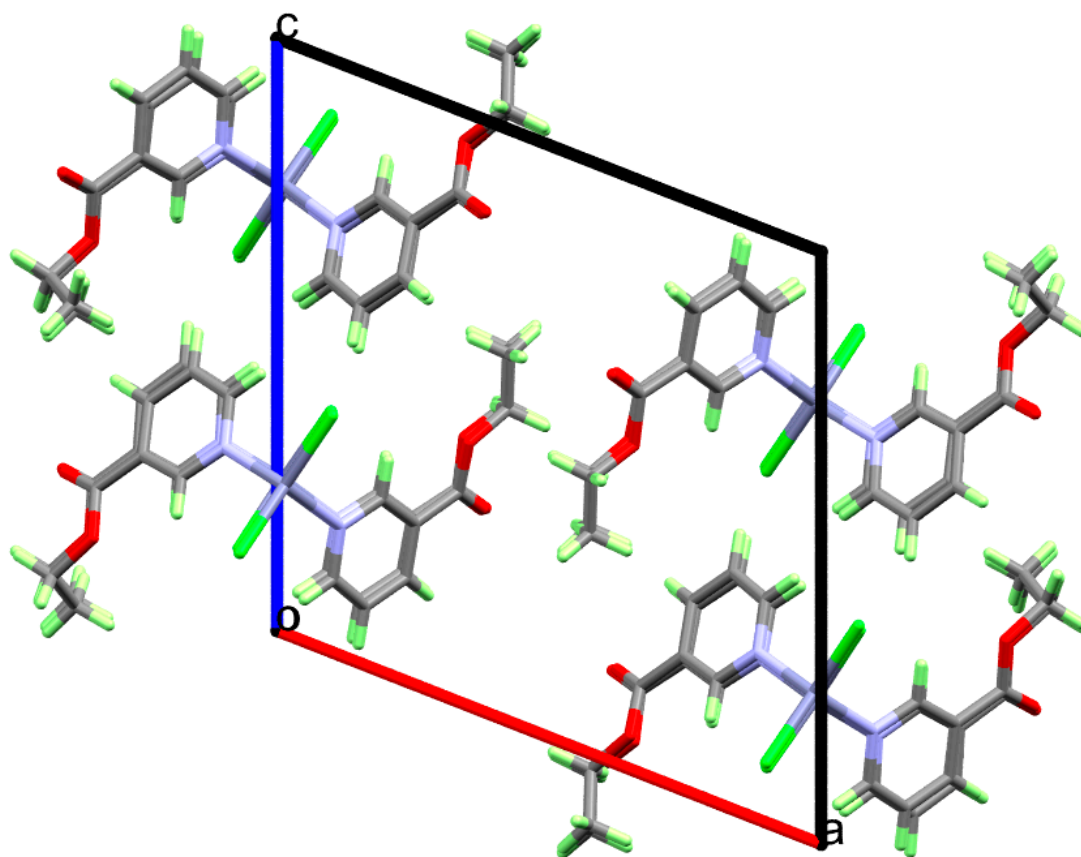

**Figure S1** View of the unit cell of **1** along the *ac* plane.

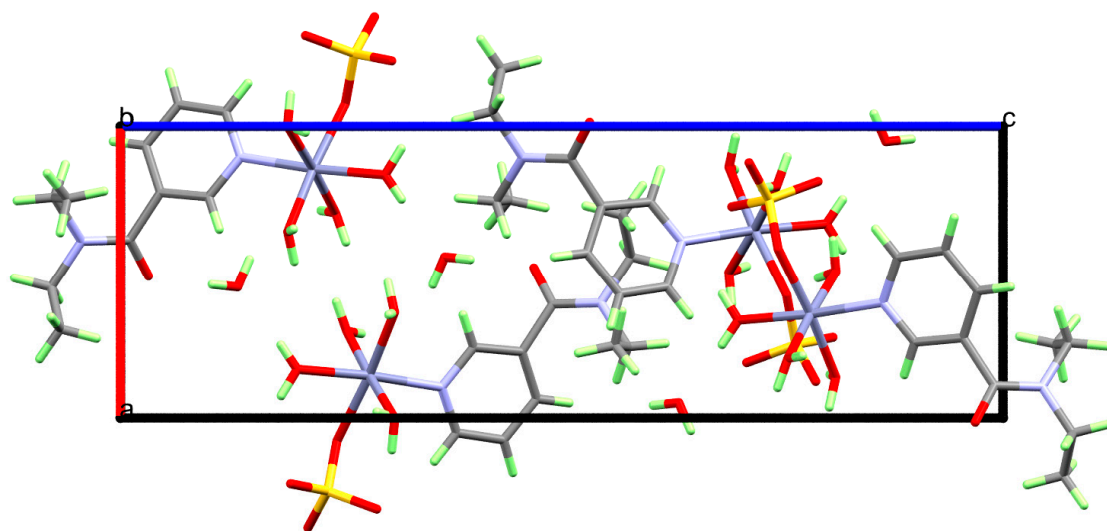

**Figure S2** View of the unit cell of **2** along the *ac* plane.

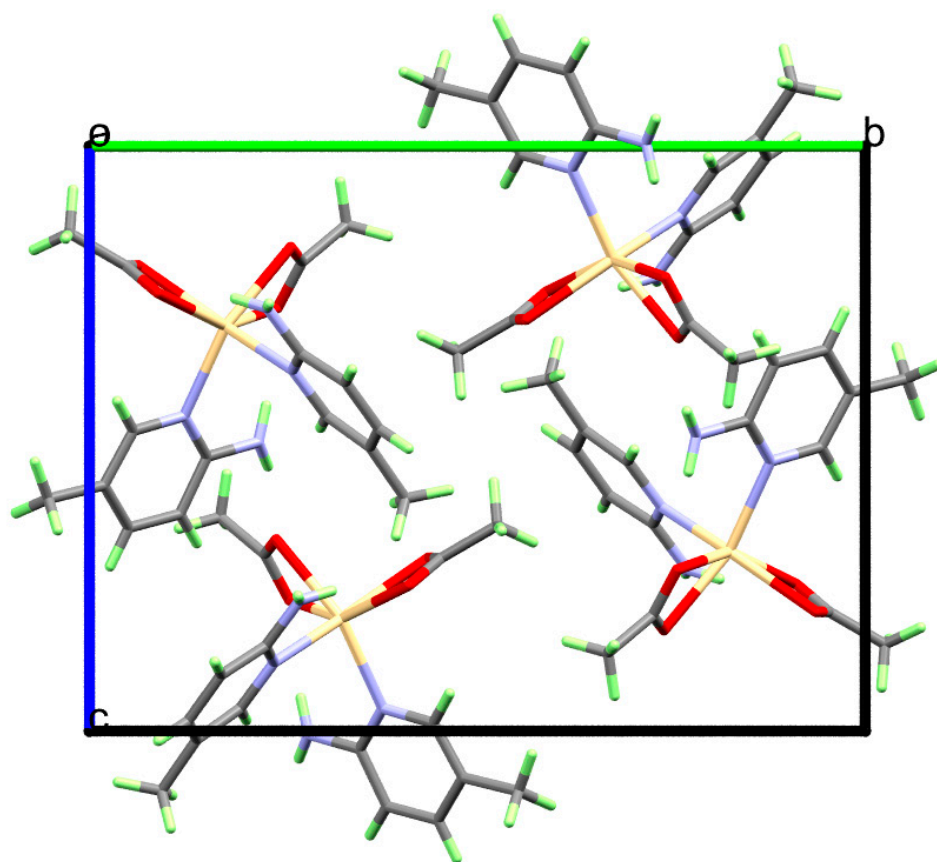

**Figure S3** View of the unit cell of **3** along the *bc* plane.



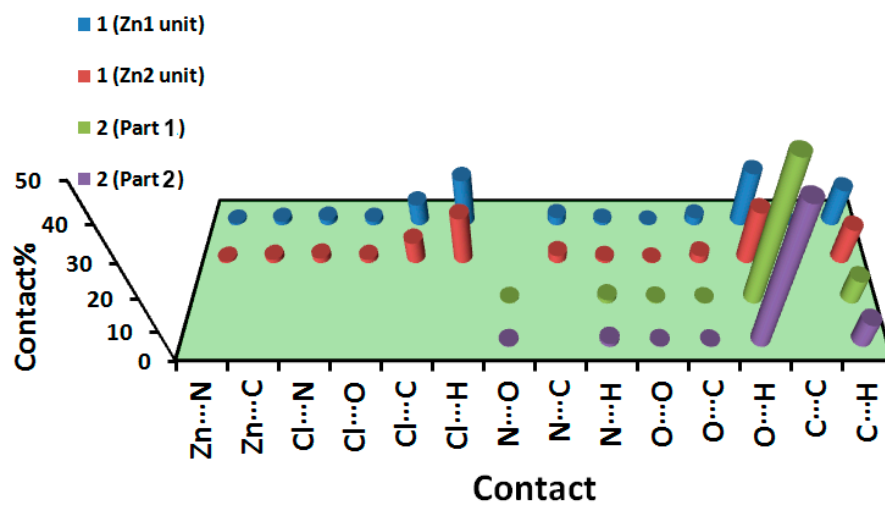

**Figure S4** Distribution of all contacts in complexes 1 and 2.

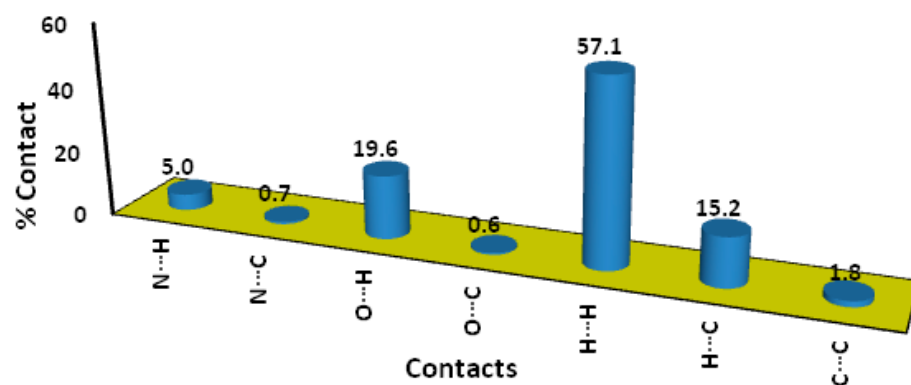

**Figure S5** Intermolecular interactions in **3** and their percentages.
